# Supplementary material for: Evolutionary Genomic Comparisons of Chelonid Herpesvirus 5 (chhv5) From Fibropapillomatosis-Afflicted Green (Chelonia Mydas), Olive Ridley (Lepidochelys Olivacea), And Kemp’s Ridley (Lepidochelys Kempii) Sea Turtles.
Source: Preprints.org preprint supplement (doi:10.20944/preprints202107.0572.v1), 2021-07-26
Supplement: Supplementary file 1 [file Supplemental Table 1.xlsx]

## Sheet: Sheet1
Supplemental Table 1. Read, alignment and ChHV5 genome coverage information for all twenty samples used in this study.
Sample ID	Host species	Sex	Raw Reads	Trimmed Reads (TrimGalore, Round 1) - ChHV5	Trimmed Reads (Trimmomatic) - ChHV5	Trimmed Reads (TrimGalore, Round 2) - turtle	ChHV5 aligned reads	Alignment Rate	RPTM (ChHV5)	Genome Coverage (x)
NovaSeq 6000
27L1Fdna	C. mydas	male	688363268	672676274	670622567		257692	0.000384259	3842.59	584.633
flSCEYFdna	C. mydas	undetermined	131017218	128477924	128061742	127704899	13627	0.00010641	1064.1	30.9159
flSCINFdna	C. mydas	undetermined	152219555	149724890	149346685	148954736	45271.5	0.00030313	3031.3	102.708
LKFLMCKFdna	L. kempii	female	150483135	147834189	147493082	147060810	14590	9.89199e-05	989.199	33.1007
LkNEFdna	L. kempii	female	111764136	109910737	109672464	109390485	9135.5	8.3298e-05	832.98	20.7259
LoTXFdna	L. olivacea	female	159344473	157593761		157305700	3018	1.91505e-05	191.505	6.847
poSCTFdna	C. mydas	undetermined	151846661	148660346	148199973	147783450	18132.5	0.000122352	1223.52	41.1376
yuLIRSFdna	C. mydas	female	621366915	607093896	604803522		128132	0.000211857	2118.57	290.696
yuRERFdna	C. mydas	female	652756503	639291588	637161203		125910	0.000197611	1976.11	285.655
yuRIRSFdna	C. mydas	female	792686343	779086042	777185350		93086	0.000119773	1197.73	211.186
yuRKTGFdna	C. mydas	female	725356042	713293957	711693678		152494	0.00021427	2142.7	345.968
yuRKTMFdna	C. mydas	female	706578319	693695473	691949993		216336	0.000312647	3126.47	490.806
yuRKTW1Fdna	C. mydas	female	630179761	617850925	615974703		65452.5	0.000106258	1062.58	148.494
yuTSFdna	C. mydas	female	858685249	843248185	841151438		141446	0.000168158	1681.58	320.902
TABT-Cm	C. mydas	male	169446633	169339286			43562.5	0.0003	2572.5	98.8312
HiSeq 3000
LiRRF4dna	C. mydas	undetermined	427162904	371533833			38502.5	0.0001	1036.31	58.23
20170226AFA (virally enriched)	L. kempii	undetermined	34533962	28898865			4222944	0.1461	1.46128e+06	9580.69
LLE-419 (virally enriched)	L. kempii	female	14641416	13710744			301155	0.022	219649	683.237
NMFS14_313 (virally enriched)	L. kempii	female	36964405	30942555			7180057	0.232	2.32045e+06	16289.6
MCK2015011701 (virally enriched)	L. kempii	female	58980497	49845450			6527585	0.131	1.30956e+06	14809.3
