# Supplementary material for: Evolutionary Genomic Comparisons of Chelonid Herpesvirus 5 (chhv5) From Fibropapillomatosis-Afflicted Green (Chelonia Mydas), Olive Ridley (Lepidochelys Olivacea), And Kemp’s Ridley (Lepidochelys Kempii) Sea Turtles.
Source: Preprints.org preprint supplement (doi:10.20944/preprints202107.0572.v1), 2021-07-26
Supplement: Supplementary file 2 [file Supplemental Table 3.xlsx]

## Sheet: Supplemental Table 3
Supplemental Table 3. Nucleotide diversity statistics for all ChHV5 genes from the pooled 20 novel ChHV5 genomes versus the ChHV5 reference genome.
Each gene has its corresponding number of sites (bases), number of polymorphic sites, nucleotide diversity, standard deviation of nucleotide diversity, average proportion of nucleotide differences between populations (Dxy) with Jukes and Cantor correction and Tajima's D statistic.
Gene	Number of sites	Polymorphic sites	π (nucleotide diversity)	Std π	Dxy JC	Tajima's D statistic
F-ICP4a	1956	71	0.01246	0.00092	0.01224	0.82961
HP1+	411	11	0.00953	0.00089	0.01008	0.9325
F-LANA	1029	75	0.02115	0.00231	0.01751	-0.14253
HP2-	681	66	0.02721	0.00339	0.02095	-0.24748
HP3-	327	10	0.0114	0.00169	0.01395	1.12601
HP4+	663	20	0.01103	0.00212	0.01784	1.12774
HP5-	537	22	0.01328	0.00187	0.01461	0.3847
HP6+	771	30	0.01197	0.00099	0.00969	-0.03195
HP8-	543	20	0.01304	0.00103	0.01034	0.74767
HP7+	552	23	0.01346	0.00096	0.01155	0.21137
F-US12	1053	24	0.00698	0.00166	0.01276	0.33223
F-US11	828	23	0.00691	0.00215	0.0141	-0.45195
F-US10	1029	16	0.0037	0.00109	0.00659	-0.77011
F-US8	1623	32	0.00665	0.00139	0.01007	0.77212
HP10-	468	9	0.00585	0.00123	0.00796	0.27114
F-US4	798	28	0.01118	0.00221	0.01581	0.50857
F-US3B	942	31	0.00793	0.00285	0.0089	-0.5683
F-US3A	1152	33	0.00699	0.00181	0.00808	-0.53167
F-US2+	894	17	0.00449	0.00129	0.00833	-0.60987
F-US1	2940	55	0.0042	0.00106	0.00524	-0.82075
HP11-	516	9	0.00534	0.00072	0.00448	0.29968
HP12+	567	11	0.00667	0.00071	0.00577	0.782
HP13-	783	21	0.00753	0.00088	0.00656	-0.01581
HP5+	537	27	0.01364	0.00178	0.01338	-0.14532
HP4-	663	20	0.01053	0.00208	0.01753	0.9078
HP3+	327	7	0.01053	0.00123	0.01333	2.44794
F-LANA	1029	97	0.02666	0.00219	0.02162	-0.30097
HP2+	681	81	0.03391	0.00326	0.026	-0.28238
F-ICP4a(ii)	1956	70	0.0126	0.0008	0.01224	0.80444
HP1-	411	13	0.01035	0.0013	0.00959	0.28428
F-UL0.5	912	30	0.00967	0.00106	0.01257	0.16673
F-UL1	381	4	0.00307	0.00094	0.00633	0.10512
F-UL2	846	18	0.00584	0.00186	0.01266	-0.10145
F-UL3	687	8	0.00293	0.00076	0.00482	-0.36534
F-UL4	591	5	0.0015	0.0004	0.00169	-1.14013
F-UL5	2538	46	0.00525	0.00125	0.00883	0.02696
HP14	624	8	0.00415	0.00111	0.0075	0.07137
F-UL6	1986	20	0.00232	0.00067	0.00419	-0.69923
HP15	516	5	0.002	0.00065	0.0033	-0.82018
F-UL7	915	14	0.00482	0.00132	0.00947	0.43076
F-UL8	2244	36	0.0054	0.00138	0.01	0.77069
F-UL9	2478	57	0.00594	0.00174	0.01212	-0.34135
F-UL10	1266	24	0.00265	0.00102	0.00404	-1.94316
F-UL11	285	7	0.00412	0.00173	0.00653	-1.33211
F-UL12	1680	17	0.00214	0.00073	0.00409	-0.93445
HP16	639	9	0.00473	0.00111	0.00946	0.65642
F-UL14	537	17	0.00819	0.00243	0.01699	-0.30584
UL15A	1014	49	0.01534	0.00406	0.03179	0.50838
F-UL16	1056	54	0.01137	0.00333	0.02294	-0.85135
F-UL17	1956	96	0.01409	0.00385	0.02787	0.03331
F-UL15B	1071	36	0.01123	0.00311	0.0239	0.60768
HP17	468	30	0.02172	0.00699	0.05349	0.79128
HP18	696	12	0.00473	0.00141	0.00926	-0.09307
HP19	483	21	0.01047	0.0036	0.02094	-0.55534
HP20	501	7	0.00388	0.00123	0.00814	-0.05163
F-UL18	993	50	0.01337	0.0041	0.02774	-0.30717
F-UL19	4152	84	0.00538	0.00168	0.01206	-0.23343
F-UL20	630	9	0.0032	0.00113	0.00678	-0.70632
F-UL21	1404	37	0.00602	0.00173	0.01005	-0.75203
F-UL22	2238	57	0.00553	0.00178	0.01124	-1.03773
F-UL23	1083	18	0.00477	0.00138	0.00968	0.07027
F-UL24	942	11	0.00342	0.00099	0.00705	0.13782
F-UL25	1674	21	0.00429	0.00125	0.00945	0.81214
HP21	474	7	0.00447	0.00148	0.01032	0.24657
F-UL26	1650	24	0.00406	0.00106	0.00781	-0.04
F-UL26.5	882	12	0.00421	0.00123	0.00908	0.34819
F-UL27	2559	39	0.00407	0.00118	0.00812	-0.20889
HP22	690	15	0.00476	0.0012	0.00787	-0.82378
HP23	870	15	0.00498	0.0015	0.0102	0.09496
F-UL28	2253	56	0.00573	0.00189	0.0125	-0.7373
F-UL29	3588	64	0.00474	0.0015	0.00989	-0.28952
HP24	942	11	0.00274	0.00088	0.00533	-0.59666
F-UL30	3456	85	0.00748	0.00216	0.01591	0.27224
F-UL31	924	23	0.00752	0.00208	0.01467	0.10409
F-UL33	336	3	0.0016	0.00054	0.00268	-0.97524
F-UL34	795	11	0.00444	0.00141	0.01015	0.487
F-UL35	366	14	0.00592	0.00235	0.00797	-1.64913
F-UL-36	6954	315	0.01539	0.0044	0.03416	0.84164
F-UL37	3246	224	0.02581	0.00615	0.04959	1.31099
F-UL38	1326	22	0.00528	0.00138	0.01	0.49683
HP25	510	5	0.00353	0.00097	0.0077	0.84814
F-UL41	1179	19	0.00521	0.0014	0.00992	0.55917
F-UL42	1077	19	0.00385	0.00113	0.00705	-0.85686
F-UL43	1227	35	0.00678	0.00207	0.01292	-0.62141
HP26	492	13	0.00505	0.00182	0.009	-1.16821
HP27	654	12	0.00491	0.00156	0.01002	-0.18244
F-UL53	1062	18	0.00448	0.00144	0.0093	-0.23414
F-UL52	2874	88	0.00954	0.00223	0.01824	0.42952
HP28	627	9	0.00362	0.00114	0.00705	-0.68268
HP29	489	17	0.01494	0.00195	0.02001	1.96209
F-M04	813	24	0.00632	0.00207	0.01398	-1.0461
HP30	537	15	0.00585	0.00177	0.00966	-0.94781
F-lec1	627	13	0.00494	0.00148	0.00948	-0.56383
F-lec2	531	12	0.00562	0.00166	0.01111	-0.42263
F-sial	963	34	0.00709	0.00214	0.01089	-1.13414
F-Nec2	1740	34	0.00514	0.0012	0.00778	-0.5678
HP31	525	6	0.00452	0.00101	0.00854	1.28601
HP32	1686	49	0.00579	0.00163	0.00866	-1.17706
HP33	462	4	0.0015	0.00049	0.00195	-1.1111
HP34	474	13	0.00424	0.00164	0.00615	-1.63712
HP35	1440	50	0.0099	0.00196	0.01391	0.04544
HP36	453	8	0.00383	0.00111	0.00443	-0.77439
HP37	2094	76	0.01005	0.0028	0.02009	-0.17433
HP38	744	44	0.01921	0.00481	0.03965	0.41095
