# Supplementary material for: Evolutionary Genomic Comparisons of Chelonid Herpesvirus 5 (chhv5) From Fibropapillomatosis-Afflicted Green (Chelonia Mydas), Olive Ridley (Lepidochelys Olivacea), And Kemp’s Ridley (Lepidochelys Kempii) Sea Turtles.
Source: Preprints.org preprint supplement (doi:10.20944/preprints202107.0572.v1), 2021-07-26
Supplement: Supplementary file 3 [file Supplemental Table 4.xlsx]

## Sheet: Sheet1
Supplemental Table 4. number of aligning reads and transcripts per million (TPM) values for every ChHV5 gene for each sample used in this study.
	MCK2015		20170226AFA		LLE-419		NMFS14_313		LkNEFdna		LKFLMCKFdna		fISCEYFdna		fISCINFdna		poSCTFdna		yuRERFdna		yuRIRSFdna		yuRKTGFdna		yuRKTMFdna		yuRKTW1Fdna		yuTSFdna		TABT-Cm		27L1Fdna		yuLIRSFdna		LoTXFdna
Gene	aligning reads	TPM	aligning reads	TPM	aligning reads	TPM	aligning reads	TPM	aligning reads	TPM	aligning reads	TPM	aligning reads	TPM	aligning reads	TPM	aligning reads	TPM	aligning reads	TPM	aligning reads	TPM	aligning reads	TPM	aligning reads	TPM	aligning reads	TPM	aligning reads	TPM	aligning reads	TPM	aligning reads	TPM	aligning reads	TPM	aligning reads	TPM
F-ICP4a	118	326.036	0	0	1	828.665	1	2.43119	0	0	0	0	0	0	0	0	0	0	0	0	0	0	0	0	0	0	0	0	0	0	0	0	0	0	0	0	0	0
F-ICP4a'	142	392.348	0	0	1	828.665	0	0	0	0	0	0	0	0	0	0	0	0	0	0	0	0	1	4.61884	0	0	0	0	1	4.9688	0	0	1	2.74599	0	0	0	0
F-LANA	0	0	0	0	0	0	0	0	0	0	0	0	0	0	0	0	0	0	0	0	0	0	0	0	0	0	0	0	0	0	0	0	0	0	0	0	0	0
F-LANA'	0	0	0	0	0	0	2	0.00924704	0	0	0	0	0	0	0	0	0	0	0	0	0	0	0	0	0	0	0	0	0	0	0	0	0	0	0	0	0	0
F-lec1	39	0.336527	137	0.0441986	6	15.5275	542	4.1152	53	12.7962	105	15.9121	101	16.2006	273	13.1285	118	14.41	750	13.121	613	14.8997	921	13.2851	1366	14.0394	398	13.7953	898	13.9348	201	10.3858	1571	13.4725	818	14.044	7	5.69627
F-lec2	14155	144266	443	168.807	5	15283.4	7	62.7752	54	15399.2	75	13424.5	92	17430	190	10792.1	80	11539.1	592	12232.8	446	12804.2	643	10955.1	992	12042.3	236	9661.81	622	11400.2	161	9825.84	1059	10726.7	652	13221.6	9	8650.35
F-M04	126	838.194	787	195.741	1	1995.12	7	40.9739	86	16007.5	124	14487	110	13602.6	372	13791.6	168	15816.5	1210	16319.7	930	17426.9	1457	16202.5	1984	15720.2	580	15498.7	1414	16915.8	329	13105.7	2337	15450.7	1377	18225.9	20	12547
F-Nec2	16993	52783.8	90	10.4522	10	9315.93	7919	21643.9	139	12080.8	192	10474.1	215	12414.3	560	9694.28	276	12132.9	1738	10945.4	1452	12704.6	2028	10530.5	3023	11184.4	887	11067.4	2047	11434.5	511	9504.76	3451	10653.5	1960	12113.4	37	10838.5
F-sial	7	39.3055	6546	1374.24	4	6736.14	26071	128810	125	19638.8	141	13904.6	148	15448	463	14488.8	166	13191.4	1270	14458.1	950	15025.9	1503	14107.9	2257	15094.8	598	13488	1429	14429.6	377	12676.1	2599	14503.6	1358	15171.8	8	4236.25
F-UL0.5	607	471.57	0	0	16	3727.98	302	206.443	88	1912.89	148	2019.31	168	2426.17	510	2208.13	215	2363.87	1461	2301.23	1128	2468.48	1916	2488.3	2670	2470.65	822	2565.2	1719	2401.61	451	2098.09	3069	2369.57	1535	2372.72	21	1538.56
F-UL1	22	130.447	0	0	11	19561.4	2	10.4346	32	5308.99	65	6768.75	45	4959.96	135	4461.11	51	4279.65	375	4508.11	263	4392.68	495	4906.44	693	4894.26	191	4549.22	473	5043.61	149	5290.39	866	5103.23	391	4612.85	9	5032.58
F-UL10	116	1648.94	1835175	975341	11	46895.9	170	2126.33	121	48126.2	146	36448.8	103	27216.9	418	33114.6	190	38223.2	1168	33662.1	748	29950.9	1425	33861.9	1959	33168.3	573	32718.5	1317	33666.7	403	34303.7	2371	33496	1184	33487.2	20	26811
F-UL11	1	4.27011	0	0	0	0	3	11.2719	7	836.349	1	74.9934	20	1587.54	38	904.316	15	906.478	96	831.117	59	709.666	119	849.446	190	966.352	38	651.801	107	821.659	33	843.807	243	1031.24	90	764.651	3	1208.09
F-UL12	0	0	6	4.26673	6	34226.2	73	1221.72	65	34591.9	147	49103.5	103	36416.9	372	39432.3	150	40376.6	1055	40683.3	742	39753.7	1339	42573.7	1877	42522.4	590	45077.1	1225	41900.2	382	43507.6	2247	42474.7	1116	42233.5	21	37667.6
F-UL14	11	35.3893	0	0	0	0	2	5.66168	12	1080.22	33	1864.56	20	1196.09	60	1075.79	43	1957.83	166	1082.78	110	996.861	193	1037.97	358	1371.84	81	1046.78	222	1284.4	43	828.395	341	1090.31	187	1197.02	14	4247.61
F-UL15B	4	40.3111	136	51.2433	24	72539.1	660	5852.55	70	19738.5	133	23539.7	132	24728.3	417	23420.6	159	22677.2	1107	22618.5	735	20864.8	1280	21563.8	2050	24607.1	552	22345.8	1337	24230.7	320	19311	2252	22555.3	1246	24984.1	9	8553.51
F-UL16	6	30.2899	484	91.3533	4	6056.23	4	17.7681	54	7627.64	80	7092.84	73	6850.52	286	8046.55	104	7430.3	756	7737.84	493	7010.61	900	7595.18	1364	8201.68	379	7685.6	784	7117.55	260	7859.76	1452	7284.98	677	6800.11	19	9045.59
F-UL17	9	46.0808	2570	491.975	18	27640.5	53	238.775	97	13896.3	171	15376.5	171	16275.3	513	14638.3	211	15289.3	1432	14865.2	1045	15071.5	1694	14499.1	2606	15892.6	726	14931.6	1567	14428.3	505	15483.1	2881	14660.1	1410	14364.1	20	9657.05
F-UL18	29	80.1274	11	1.13634	1	828.665	3	7.29357	70	5411.67	114	5531.87	97	4982.06	403	6205.62	149	5826.35	958	5366.61	726	5650.44	1126	5200.81	1630	5364.3	514	5704.78	1018	5058.24	317	5244.84	1934	5310.74	1041	5722.89	17	4429.65
F-UL19	20	108.905	134	27.2807	23	37561.4	22	105.409	278	42355.8	438	41886.7	467	47270.4	1572	47705.5	616	47470.7	4185	46202.5	2731	41889.2	5054	46004.8	6874	44583.1	2160	47245.9	4578	44829.4	1414	46106	8404	45479.9	4244	45980.6	80	41081.4
F-UL2	1	1.3013	0	0	6	2341.66	27	30.9155	39	1420.01	84	1919.73	73	1765.85	214	1551.99	77	1418.06	603	1590.91	427	1565.19	792	1722.87	1139	1765.4	333	1740.66	670	1567.91	186	1449.37	1174	1518.31	590	1527.6	21	2577.11
F-UL20	1	6.39253	2	0.478009	2	3834.42	1	5.62482	32	5723.65	64	7185.17	60	7129.82	197	7018.38	86	7780.34	523	6778.39	387	6968.62	599	6401.03	936	7126.75	266	6830.42	583	6702.09	165	6316.07	1116	7090.11	491	6245.05	7	4219.96
F-UL21	21	180.343	1	0.321079	17	43784.9	2859	21603.8	84	20184.1	119	17947.8	137	21870.3	451	21585.1	183	22241.1	1221	21259.2	909	21989	1585	22754	2150	21991.8	591	20387.3	1433	22130.6	437	22472.5	2503	21362.7	1419	24246.2	7	5669.1
F-UL22	112	431.211	740	106.521	3	3464.09	11448	38782.7	150	16159	238	16092.9	206	14743.3	853	18302.8	298	16237.4	2074	16189.5	1499	16256.9	2612	16811.1	3693	16935.3	1170	18094.7	2436	16866.2	673	15515.9	4393	16809.3	2291	17550.1	40	14523.4
F-UL23	124	299.423	24	2.16675	5	3621.01	3680	7818.93	64	4324.08	100	4240.8	80	3590.94	286	3848.82	115	3929.96	937	4587.28	659	4482.41	1111	4484.64	1593	4581.65	437	4238.75	1030	4472.7	322	4655.96	1832	4396.48	936	4496.98	12	2732.64
F-UL24	0	0	0	0	2	2994.53	68	298.708	35	4889.01	67	5874.37	66	6124.93	180	5008.09	85	6005.49	549	5556.82	388	5456.28	679	5666.59	965	5738.15	280	5615.04	588	5278.96	197	5889.23	1116	5537.1	574	5701.59	13	6120.44
F-UL25	0	0	0	0	3	5164.85	0	0	82	13170.6	124	12501	129	13765.3	489	15644	206	16735.3	1242	14454.8	882	14261.7	1461	14019.7	2158	14754.8	647	14918.9	1421	14669.1	453	15571.4	2473	14108.5	1285	14676.6	30	16240.5
F-UL26	1	3.22875	198	23.9019	1	968.345	5	14.2049	59	5330.11	132	7485	96	5761.82	328	5902.08	135	6168.71	890	5826.07	612	5566.06	986	5321.82	1422	5468.6	453	5875.23	931	5405.7	271	5239.54	1741	5586.61	891	5723.91	15	4567.33
F-UL26.5	0	0	0	0	0	0	0	0	0	0	0	0	0	0	0	0	0	0	0	0	0	0	0	0	0	0	0	0	0	0	0	0	0	0	0	0	0	0
F-UL27	1140	6989.7	6	1.37543	4	7355.46	0	0	101	17327.1	179	19274.8	159	18122	544	18588.8	221	19176.7	1512	18795.7	1133	19568	1727	17700.9	2525	18439.9	753	18545.6	1621	17873.3	560	20560.4	3067	18688.9	1587	19360.3	17	9829.69
F-UL28	37	78.1324	0	0	15	9499.85	11	20.4389	149	8803.71	261	9679.52	210	8243.34	785	9238.39	339	10131.1	2261	9680.14	1638	9743.3	2647	9344	3765	9469.71	1186	10060.2	2570	9759.58	734	9281.44	4514	9473.41	2287	9608.97	73	14537.5
F-UL29	56	134.323	242	21.7025	21	15107	71789	151515	232	15570.4	325	13690.8	359	16007	1258	16816.6	447	15173.9	3247	15790.5	2288	15459	3941	15802.2	5475	15641.8	1551	14944	3578	15433.7	1220	17523.1	6656	15866.8	3208	15310.1	72	16286.6
F-UL3	0	0	0	0	3	1354.93	2	2.65011	48	2022.51	76	2010	72	2015.51	234	1963.87	79	1683.65	667	2036.46	448	1900.37	910	2290.81	1183	2121.9	372	2250.27	700	1895.68	275	2479.82	1416	2119.23	724	2169.29	26	3692.4
F-UL30	15	118.113	9	2.6496	8	18892.6	2	13.8571	216	47589.3	381	52688.3	338	49474	1285	56390.5	436	48586.9	3207	51198.4	2450	54341.9	3774	49677.2	5340	50082.9	1627	51461.9	3662	51855.3	1207	56911.9	6759	52893.7	3309	51842.2	58	43069.6
F-UL31	52	81.299	5	0.29227	1	468.897	16220	22313.5	58	2537.23	94	2581.03	68	1976.26	284	2474.56	110	2433.89	840	2662.64	643	2831.75	975	2548.21	1417	2638.72	426	2675.37	988	2777.84	288	2696.27	1714	2663.23	813	2529.03	17	2506.5
F-UL33	0	0	0	0	2	3510.38	3	15.4485	28	4584.97	38	3905.67	49	5330.63	132	4305.26	56	4638.13	365	4330.85	278	4582.85	401	3923.03	661	4607.57	203	4772.18	449	4725.45	104	3644.61	745	4333.11	381	4436.44	13	7174.78
F-UL34	0	0	0	0	1	4835.94	7	99.3159	43	19400.1	53	15008.8	57	17085	209	18781.4	94	21450.6	526	17195.8	390	17713.8	678	18275.3	968	18591	291	18848.2	611	17717.2	228	22014.5	1145	18348.7	606	19441.9	19	28891.9
F-UL35	14	95.2439	24	6.10455	0	0	439	2627.9	8	1522.82	15	1792.19	10	1264.63	54	2047.39	13	1251.64	127	1751.72	104	1992.99	174	1978.83	198	1604.42	69	1885.61	161	1969.72	33	1344.35	291	1967.51	119	1610.78	7	4491.01
F-UL-36	12	177.59	22431	12411.3	20	88769.4	31971	416322	423	175157	637	165562	667	183492	2251	185656	829	173627	6056	181708	4228	176252	7290	180349	9678	170594	2921	173644	6749	179616	2171	192392	12143	178599	5844	172079	195	272150
F-UL37	0	0	162	10.0824	21	10484.1	3796	5560.03	80	3726.11	91	2660.36	98	3032.46	412	3822.17	170	4004.89	986	3327.7	733	3437.02	1153	3208.44	1671	3313.1	544	3637.53	1211	3625.17	306	3050.19	2009	3323.61	964	3192.81	1	156.983
F-UL38	4	16.307	0	0	7	8558.71	5	17.9358	59	6730.02	104	7446.14	112	8487.63	408	9269.82	167	9635.13	1019	8422.48	695	7981.08	1270	8655	1790	8691.79	543	8892.14	1229	9010.2	377	9203.33	2243	9087.8	1080	8760.3	1	384.46
F-UL4	8190	74982.8	9	3.08073	3	8237.49	0	0	36	9222.11	68	10933.8	55	9360.41	240	12245.8	81	10495.2	558	10357.7	414	10676.8	779	11922.4	991	10806.7	274	10076.8	672	11064.1	235	12883.5	1185	10782.3	526	9581.75	11	9497.46
F-UL41	8	36.6838	16	2.74307	12	16503	612	2469.29	107	13728.4	128	10308.1	138	11763	455	11627.7	180	11681.1	1323	12299.7	903	11663.7	1503	11521.1	2171	11857.3	621	11438.5	1482	12220.9	461	12658.3	2573	11725.7	1385	12636.2	2	864.872
F-UL42	2	10.0403	0	0	14	21078.6	201	887.87	61	8568.36	113	9962.77	82	7652.19	314	8785.06	141	10017.6	892	9078.92	650	9191.65	1091	9155.71	1482	8861.52	422	8509.86	1004	9064	294	8838.01	1773	8845.9	890	8889.74	8	3787.43
F-UL43	8429	37137.7	6	0.988379	2	2642.81	10	38.7682	67	8259.7	126	9749.76	106	8681.6	381	9355.39	129	8043.7	1079	9638.57	702	8712.43	1177	8668.93	1651	8664.21	538	9521.69	1032	8176.88	311	8205.21	2016	8827.66	989	8669.96	24	9972.12
F-UL5	10	21.2917	58497	4656.67	33	21072.7	128	239.803	132	7863.82	205	7665.62	212	8390.73	712	8448.64	304	9160.3	1794	7744.32	1339	8030.69	2279	8111.54	3267	8285.16	1045	8937.54	2089	7998.65	706	9001.27	3970	8400.7	1868	7913.48	45	9035.64
F-UL52	29	54.5246	2497	175.528	11	6202.73	1085	1794.98	183	9627.1	332	10962.7	279	9751.08	1052	11023.2	417	11095.8	2841	10829.7	2091	11074.2	3370	10591.9	4762	10664.1	1461	11034.1	3089	10444.3	907	10211.5	5688	10628.4	2929	10957.1	67	11879.7
F-UL53	22	112.005	1	0.190348	5	7634.5	4677	20951.6	55	7834.79	100	8941.25	109	10315.6	354	10044.2	151	10879.7	1055	10889.8	668	9579.74	1046	8902.17	1590	9641.71	445	9100.53	1020	9338.63	333	10151.9	1749	8849.52	928	9400.34	32	15363.9
F-UL6	0	0	4716	479.817	4	3264.57	4	9.57779	90	6852.7	177	8459.15	141	7132.52	507	7689.08	210	8087.52	1404	7746.19	1046	8017.96	1851	8420.26	2556	8284.62	753	8231.08	1728	8456.33	564	9190.48	3089	8354.16	1399	7574.75	47	12061.6
F-UL7	1	5.90995	2	0.441923	0	0	3	15.6006	34	5622.28	63	6538.95	70	7690.17	190	6257.99	86	7192.98	607	7273.17	446	7424.74	850	8397.54	1127	7933.23	352	8356.39	698	7418.36	242	8564.24	1356	7964.51	654	7690.29	20	11146.8
F-UL8	0	0	4	0.360158	8	5778.12	7	14.8332	124	8355.5	250	10573.6	215	9624.84	739	9918.42	277	9440.77	1925	9399.03	1402	9510.67	2426	9766.54	3374	9678.05	1090	10544.3	2026	8774.22	705	10166.7	3999	9571.23	1890	9056.15	44	9992.87
F-UL9	1	2.18074	71	5.78889	10	6540.33	752	1442.97	157	9579.74	232	8885.37	248	10053.3	823	10002.3	348	10740.1	2233	9872.89	1658	10184.8	2692	9813.6	3927	10200.2	1066	9337.99	2409	9447.34	757	9885.29	4545	9850.39	2030	8808.08	66	13573.3
F-US1	106	194.821	3818	262.361	6	3307.33	273	441.498	244	12547.9	414	13363.3	339	11582	1033	10581	400	10404.4	2958	11022.5	2162	11193.1	3782	11619.9	5372	11760	1564	11546.7	3293	10884.1	946	10411.4	6258	11430.9	2765	10111.3	66	11439.6
F-US10	8	42.0365	0	0	3	4727.75	27	124.835	53	7792.25	106	9781.97	93	9083.94	252	7379.63	138	10262.3	745	7936.79	582	8614.35	1014	8906.85	1426	8924.8	329	6944.25	815	7701.28	252	7929.16	1552	8104.83	663	6931.57	17	8424.08
F-US11	0	0	0	0	2	3917.87	8	45.978	39	7127.53	94	10782.9	58	7042.17	171	6224.69	72	6655.55	577	7641.03	384	7065.1	710	7752.33	1007	7834.23	283	7425.11	571	6707.01	154	6023.31	1167	7575.49	540	7017.77	27	16631.3
F-US12	6	30.8081	0	0	7	10779.7	32	144.577	80	11493.5	145	13075.7	96	9163.04	344	9843.96	165	11990.2	1086	11305.7	724	10471.7	1311	11252.9	1869	11430.5	536	11055.3	1232	11376.1	354	10884.5	2256	11512.5	1011	10328.7	26	12590
F-US2	145	877.094	9	2.03542	3	5442.47	7	37.2574	96	16248	129	13704.1	145	16304.3	399	13450.8	150	12840.9	934	11454.5	812	13835.6	1378	13934	1804	12997.4	527	12805.1	1242	13510.4	341	12351.6	2223	13363.9	1074	12926	36	20536.1
F-US3A	5112	23990.8	0	0	7	9852.55	14394	59439	95	12474.6	157	12940.1	126	10992.1	417	10906.6	153	10161.9	1163	11065.9	812	10734.3	1430	11218.6	2084	11649.2	573	10801.9	1161	9798.41	434	12196.5	2381	11105.3	1168	10906.3	24	10621.9
F-US3B	0	0	0	0	1	1721.62	1	5.05098	39	6264.05	90	9073.33	65	6935.98	336	10749.2	109	8855.1	805	9368.88	526	8505.28	989	9490.43	1351	9237.15	395	9108.14	754	7783.6	221	7596.65	1519	8665.9	760	8680.31	17	9202.93
F-US4	299	2026.48	19	4.81458	2	4065.35	4	23.8543	74	14033.1	109	12974.2	67	8441.13	276	10425	125	11989.7	783	10759.3	558	10652.9	1050	11896.3	1506	12157.3	489	13312.9	885	10786.6	260	10552	1811	12198.5	842	11354.4	22	14061.5
F-US8	6	19.9816	8	0.996097	9	8989.13	1245	3648.25	119	11088.6	200	11697.5	161	9966.88	526	9762.52	207	9756.1	1438	9709.34	1115	10459.6	1931	10750.1	2817	11174	804	10755.4	1719	10294.9	539	10748.7	3145	10409.1	1527	10118.1	53	16645.3
HP1	0	0	0	0	0	0	0	0	0	0	0	0	0	0	0	0	0	0	0	0	0	0	0	0	0	0	0	0	0	0	0	0	0	0	0	0	0	0
HP1'	0	0	0	0	0	0	0	0	0	0	0	0	0	0	0	0	0	0	0	0	0	0	0	0	0	0	0	0	0	0	0	0	0	0	0	0	0	0
HP10	3	34.7004	2872	1242.02	2	6938.08	2	20.3554	50	16182	76	15438.7	57	12255.8	200	12892.6	88	14405.3	557	13062.3	389	12674.3	758	14656.5	1088	14989.4	301	13985.3	623	12958.9	214	14822.3	1287	14794.7	606	13946.6	10	10908.1
HP11	0	0	0	0	0	0	0	0	0	0	0	0	0	0	1	58.4548	0	0	1	21.2654	3	88.6353	6	105.202	4	49.9718	2	84.2646	4	75.4486	0	0	7	72.9686	2	41.7382	0	0
HP12	0	0	0	0	0	0	0	0	0	0	0	0	0	0	0	0	0	0	0	0	0	0	0	0	0	0	0	0	0	0	0	0	0	0	0	0	0	0
HP13	0	0	0	0	0	0	0	0	0	0	0	0	0	0	0	0	0	0	0	0	0	0	0	0	0	0	0	0	0	0	0	0	0	0	0	0	0	0
HP14	0	0	0	0	0	0	0	0	0	0	0	0	0	0	0	0	0	0	0	0	0	0	0	0	0	0	0	0	0	0	0	0	0	0	0	0	0	0
HP15	0	0	0	0	0	0	0	0	0	0	0	0	0	0	0	0	0	0	0	0	0	0	0	0	0	0	0	0	0	0	0	0	0	0	0	0	0	0
HP16	1	8.4666	0	0	3	7617.75	0	0	2	473.794	9	1338.24	5	786.926	23	1085.26	5	599.109	61	1047.11	37	882.416	54	764.28	108	1089.12	23	782.221	65	989.672	23	1166.08	137	1152.78	76	1280.28	0	0
HP17	0	0	0	0	2	6938.08	20	203.554	14	4530.97	23	4672.24	30	6450.43	89	5737.2	29	4747.2	269	6308.37	190	6190.55	364	7038.24	514	7081.39	155	7201.73	374	7779.53	67	4640.64	553	6357.02	229	5270.23	4	4363.25
HP18	0	0	3	0.871764	0	0	22	150.454	50	10873.4	56	7643.93	77	11124.7	195	8446.5	90	9899.53	634	9990.47	449	9830.01	772	10030.3	1080	9997.95	320	9990.5	727	10161.3	193	8982.4	1337	10327.4	658	10175.4	7	5130.74
HP19	1879	21.0576	0	0	2	6.72216	11509	113.49	29	9.0935	33	6.49502	47	9.79118	133	8.30676	65	10.3092	444	10.0883	364	11.4907	555	10.3974	684	9.13022	228	10.2638	511	10.2985	124	8.32136	866	9.64531	420	9.36512	12	12.6824
HP2	0	0	0	0	0	0	0	0	0	0	0	0	0	0	0	0	0	0	0	0	0	0	0	0	0	0	0	0	0	0	0	0	0	0	0	0	0	0
HP2'	0	0	0	0	0	0	0	0	0	0	0	0	0	0	0	0	0	0	0	0	0	0	0	0	0	0	0	0	0	0	0	0	0	0	0	0	0	0
HP20	5810	62767.7	0	0	60	194405	27	256.661	49	14811.7	85	16127.3	84	16869.2	287	17279.8	115	17582.7	793	17369.4	623	18958.8	958	17301.1	1311	16869.6	424	18400	960	18650.9	218	14102.8	1678	18016.4	850	18270.9	8	8150.55
HP21	0	0	0	0	0	0	0	0	0	0	0	0	0	0	0	0	0	0	0	0	0	0	0	0	0	0	0	0	0	0	0	0	0	0	0	0	0	0
HP22	0	0	0	0	0	0	0	0	0	0	0	0	0	0	0	0	0	0	0	0	0	0	0	0	0	0	0	0	0	0	0	0	0	0	0	0	0	0
HP23	0	0	0	0	0	0	0	0	0	0	0	0	0	0	0	0	0	0	0	0	0	0	0	0	0	0	0	0	0	0	0	0	0	0	0	0	0	0
HP24	0	0	0	0	2	3443.23	0	0	11	1766.78	30	3024.44	23	2454.27	83	2655.31	26	2112.23	198	2304.4	108	1746.33	198	1900.01	289	1975.97	89	2052.21	179	1847.83	96	3299.9	343	1956.82	213	2432.77	3	1624.05
HP25	0	0	0	0	0	0	0	0	0	0	0	0	0	0	0	0	0	0	0	0	0	0	0	0	0	0	0	0	0	0	0	0	0	0	0	0	0	0
HP26	0	0	0	0	0	0	0	0	0	0	0	0	0	0	0	0	0	0	0	0	0	0	0	0	0	0	0	0	0	0	0	0	0	0	0	0	0	0
HP27	49131	406417	1	0.309278	2	4961.84	13	94.6228	36	8332.38	63	9152.53	71	10917.7	219	10096.2	82	9599.7	586	9828.02	466	10858.4	693	9582.96	920	9064.56	283	9403.63	637	9475.99	176	8718.05	1155	9495.42	627	10319.7	18	14041.9
HP28	2	17.2578	3	0.967854	0	0	440	3340.75	45	10864.7	80	12123.5	74	11869.8	224	10772.1	74	9036.79	679	11878.9	495	12031.6	744	10731.9	1075	11048.6	268	9289.29	809	12553.7	155	8008.98	1161	9956.42	619	10627.4	15	12206.3
HP29	153	1693.56	1	0.41385	0	0	190	1850.54	0	0	0	0	0	0	0	0	1	156.652	1	22.442	1	31.1798	0	0	0	0	0	0	1	19.9058	0	0	0	0	0	0	0	0
HP3	0	0	0	0	0	0	2219	32352.3	0	0	0	0	0	0	0	0	0	0	0	0	0	0	0	0	0	0	0	0	0	0	0	0	0	0	0	0	0	0
HP3'	0	0	0	0	1	4969.45	1853	27016.2	0	0	0	0	0	0	0	0	0	0	0	0	0	0	0	0	0	0	0	0	0	0	0	0	0	0	0	0	0	0
HP30	1	10.0778	12	4.52146	3	9067.39	931	8255.64	90	25378	83	14690.2	113	21168.9	281	15782.2	134	19111.6	881	18000.8	648	18395.1	943	15886.4	1414	16972.9	401	16233.1	968	17543.2	258	15569.5	1673	16756.2	950	19048.9	7	6652.73
HP31	0	0	0	0	0	0	0	0	0	0	0	0	0	0	0	0	0	0	0	0	0	0	0	0	0	0	0	0	0	0	0	0	0	0	0	0	0	0
HP32	31209	100048	881	105.594	3	2884.35	683	1926.58	158	14172.2	258	14525.6	236	14063.6	641	11452.1	307	13928.2	2039	13252.5	1563	14114	2354	12615	3446	13157.9	1027	13224.9	2270	13086.5	602	11556.2	3942	12559.2	2110	13458.4	29	8767.28
HP33	28	328.085	315	137.998	2	7028.38	1	10.3101	72	23605.4	102	20990	85	18514.1	291	19002.9	114	18904.3	885	21024.4	649	21420.8	1019	19959.6	1428	19929.6	454	21368.7	1013	21345.5	248	17400.8	1737	20227.6	890	20749.1	7	7735.07
HP34	954	10894.7	4	1.7079	2	6850.07	27	271.312	72	23006.5	108	21660.9	123	26111.3	286	18202.5	132	21333.9	844	19541.7	684	22003.3	994	18976	1378	18743.9	436	20000.8	939	19284.3	239	16343.9	1780	20202.5	887	20154.6	10	10769.8
HP35	1712	6426.47	287	40.2795	4	4503.24	375	1238.61	122	12813.8	211	13910.3	178	12420.6	468	9790.67	166	8818.69	1420	10807.1	1163	12297.3	1730	10855.9	2522	11276	762	11489.9	1696	11448.9	427	9598.13	2886	10766.7	1503	11225.6	11	3894.03
HP36	1709	20423.7	0	0	1	3584.16	5	52.5772	7	2340.67	19	3987.76	16	3554.4	74	4928.56	16	2706.07	198	4797.43	125	4207.89	240	4794.6	283	4028.29	113	5424.53	206	4427.18	55	3935.9	359	4263.85	168	3994.68	12	13524.1
HP37	0	0	26108	2519.23	12	9288.34	1575	3576.65	101	7293.43	176	7977.32	183	8779.43	507	7292.32	157	5734.39	1427	7466.83	1042	7575.15	1813	7821.82	2536	7795.65	678	7028.82	1450	6729.72	475	7340.81	2880	7387.01	1326	6809.03	64	15576.8
HP38	0	0	0	0	0	0	0	0	0	0	0	0	0	0	0	0	0	0	0	0	0	0	0	0	0	0	0	0	0	0	0	0	0	0	0	0	0	0
HP4	0	0	0	0	5	12236	1	7.17972	0	0	0	0	0	0	0	0	0	0	0	0	0	0	0	0	0	0	0	0	0	0	0	0	0	0	0	0	0	0
HP4'	0	0	0	0	2	4894.38	0	0	0	0	0	0	0	0	0	0	0	0	0	0	0	0	0	0	0	0	0	0	0	0	0	0	0	0	0	0	0	0
HP5	7	70.5445	0	0	3	9067.39	3	26.6025	0	0	0	0	0	0	0	0	0	0	0	0	0	0	0	0	0	0	0	0	0	0	0	0	0	0	0	0	0	0
HP5'	10	100.778	2	0.753577	4	12089.9	2	17.735	0	0	0	0	0	0	0	0	0	0	0	0	0	0	0	0	0	0	0	0	0	0	0	0	0	0	0	0	0	0
HP6	0	0	0	0	0	0	2	12.3454	0	0	0	0	0	0	0	0	0	0	0	0	0	0	0	0	0	0	0	0	0	0	0	0	0	0	0	0	0	0
HP7	575	5636.97	0	0	3	8820.55	0	0	14	3840.22	23	3959.95	24	4373.65	75	4097.67	23	3191.05	215	4273.35	212	5854.32	258	4228.12	411	4799.13	122	4804.3	287	5059.75	81	4755.03	468	4559.74	196	3823.1	1	924.518
HP8	0	0	0	0	0	0	0	0	0	0	0	0	0	0	0	0	0	0	0	0	0	0	0	0	0	0	0	0	0	0	0	0	0	0	0	0	0	0
UL15A	6695	35700.2	24	4.78481	6	9595.5	0	0	33	4923.62	73	6836.4	63	6244.76	252	7488.9	87	6565.48	613	6627.24	409	6143.37	821	7318.35	1074	6821.3	318	6811.46	727	6971.46	222	7088.64	1319	6990.06	663	7034.21	6	3017.23
